# Supplementary material
Source: PubMed Central journal article supplement (PMC9561148)
Supplement: 41396_2022_1287_MOESM1_ESM.pdf [file 41396_2022_1287_MOESM1_ESM.pdf]

## Supplemental Materials

### **Amino acid utilization allows intestinal dominance of *Lactobacillus amylovorus***

Yujia Jing<sup>1,2#</sup>, Chunlong Mu<sup>1,2#</sup>, Huisong Wang<sup>1,2</sup>, Junhua Shen<sup>1,2</sup>, Erwin G. Zoetendal<sup>1,2,3</sup>, Weiyun Zhu<sup>1,2\*</sup>

<sup>1</sup> Laboratory of Gastrointestinal Microbiology, Jiangsu Key Laboratory of Gastrointestinal Nutrition and Animal Health, College of Animal Science and Technology, Nanjing Agricultural University, Nanjing 210095, China

<sup>2</sup> National Center for International Research on Animal Gut Nutrition, Nanjing Agricultural University, Nanjing 210095, China

<sup>3</sup> Laboratory of Microbiology, Wageningen University & Research, Wageningen, Netherlands

# These authors contribute equally.

\* Corresponding author.

Email address: zhuweiyun@njau.edu.cn (W. Zhu)

**Table S1.** Composition and nutrient analysis of experimental diets.

| Ingredients, %                            | Intact casein group | Hydrolyzed casein group |
|-------------------------------------------|---------------------|-------------------------|
| Intact casein                             | 4.50                | -                       |
| Hydrolyzed casein                         | -                   | 4.50                    |
| Corn                                      | 45.00               | 45.00                   |
| Fish meal                                 | 1.00                | 1.00                    |
| Soybean oil                               | 2.31                | 2.31                    |
| Corn starch                               | 25.00               | 25.00                   |
| Rice husk powder                          | 4.00                | 4.00                    |
| Choline chloride                          | 0.10                | 0.10                    |
| Dicalcium phosphate                       | 1.99                | 1.99                    |
| Sodium bicarbonate                        | 4.44                | 4.44                    |
| L-Lys, 78.8%                              | 1.00                | 1.00                    |
| DL-Met, 99%                               | 0.18                | 0.18                    |
| L-Thr, 98.5%                              | 0.45                | 0.45                    |
| L-Trp, 98%                                | 0.12                | 0.12                    |
| L-Leu, 98.5%                              | 0.46                | 0.46                    |
| L-Ile, 98.5%                              | 0.54                | 0.54                    |
| L-Phe, 98.5%                              | 0.35                | 0.35                    |
| L-Val, 98.5%                              | 0.37                | 0.37                    |
| L-Asp, 99%                                | 0.56                | 0.56                    |
| L-Glu, 99%                                | 0.73                | 0.73                    |
| L-Ser, 98.5%                              | 0.20                | 0.20                    |
| L-Arg, 98.5%                              | 0.20                | 0.20                    |
| L-His, 80.1%                              | 0.20                | 0.20                    |
| L-Ala, 99%                                | 0.28                | 0.28                    |
| L-Gly, 99%                                | 0.26                | 0.26                    |
| L-Cys, 98.5%                              | 0.25                | 0.25                    |
| Vitamins and minerals Premix <sup>a</sup> | 1.00                | 1.00                    |
| Glucose                                   | 2.00                | 2.00                    |
| Sucrose                                   | 2.00                | 2.00                    |
| Limestone                                 | 0.10                | 0.10                    |
| Chromium oxide                            | 0.35                | 0.35                    |
| Zinc oxide                                | 0.05                | 0.05                    |
| Total                                     | 100.00              | 100.00                  |
| Nutrition level, %                        |                     |                         |
| NE, MJ/kg                                 | 10.08               | 10.08                   |
| Crude protein                             | 13.30               | 13.30                   |
| Crude fiber                               | 2.60                | 2.60                    |

a: The premix provided the following per kg of diet: vitamin A, 8,000 IU; vitamin D<sub>3</sub>, 2,4000 IU, vitamin E, 20 mg, pantothenic acid, 15 mg; vitamin B<sub>6</sub>,

5 mg; biotin, 0.3 mg; folic acid, 3 mg; vitamin B<sub>12</sub>, 0.03 mg; ascorbic acid, 40 mg; Fe, 120 mg; Cu, 25 mg; Mn, 20 mg; Zn, 120 mg; I, 0.5 mg; Se, 0.3 mg.

Table S2. The Primer sequences of AA and peptide transporter genes and AA metabolic enzymes

| Items                                                       | Primer sequence (F:5'→3')  | Primer sequence (R:5'→3')   |
|-------------------------------------------------------------|----------------------------|-----------------------------|
| <b>Bacteria</b>                                             |                            |                             |
| Total <i>Lactobacillus</i>                                  | AGCAGTAGGGAATCTTCCA        | ATTCCACCGCTACACATG          |
| <i>Limosilactobacillus reuteri</i>                          | GATTGACGATGGATCACCA<br>GT  | CATCCCAGAGTGATAGCC<br>AA    |
| <i>Lactobacillus amylovorus</i>                             | CAAGCACGATTGGCAAGAT<br>G   | ATTGGATTCCGCTTCTGT<br>GG    |
| <i>Ligilactobacillus salivarius</i>                         | TACACCGAATGCTTGCATTC<br>A  | AGGATCATGCGATCCTTA<br>GAGA  |
| <i>Lactobacillus johnsonii</i>                              | AGAGAGAAACTCAACTGA<br>AATA | CCTTCATTAACCTTAACAG<br>TTAA |
| <i>Lacticaseibacillus paracasei</i>                         | CAATGCCGTGGTTGTTGGA<br>A   | GCCAATCACCGCATTAAATC<br>G   |
| <b>Bacterial functional genes</b>                           |                            |                             |
| <i>potE6</i> - Amino acid transporter gene                  | AAAGCACCATTCTCCTCA         | GAAATGATTGGCAGGTAT          |
| <i>optB</i> - Oligopeptide ABC transporter permease protein | CGGTACATCCTTCCAATA         | GATAACGCCAAGCACAAAC         |
| <i>artJ</i> - ABC transporter arginine-binding protein      | GGCAGACAATGACCAAGA         | CTAAGCAAGTCGCCCAA           |
| <i>bcaP</i> - Branched-chain amino acid permease            | ATACATCGGCTTTGACTC         | GTGAACATCCCAAGAACG          |
| <i>gluA</i> - Glutamate transport ATP-binding protein       | TACGCTGCTCCGCACTTT         | AGCCTGCTTTCTAACCTC<br>ATCT  |
| <i>metN</i> - Methionine import ATP-binding protein         | AGAACGATTAACCTCCTG         | AATAACTGTTTGCCTC            |
| <i>lysXY</i> - Amino acid transport ATP-binding protein     | ATCAAGGCTAAACCACAA         | ATACACGGTCTGAAATGC          |
| <i>metK</i> - S-adenosylmethionine synthetase               | ACTGTGCCGTAATGGTTG         | CTTCTGCATCGGTTTGAG          |
| <i>dapA</i> -4-hydroxy-tetrahydrodipicolinate synthase      | GTGGGAGGAACAACCTGGA        | TGATTGGCATTGCGTCT           |
| <i>dapB</i> -4-hydroxy-tetrahydrodipicolinate reductase     | CTAAAGAAGCGGCTAAAT         | CCTTGATAATCTCCACCAC         |
| <i>sda</i> - L-serine dehydratase                           | CCCTTTCTGGCGACACGA         | TGCGTTCCCAGCACCAAT          |
| <i>bcat</i> - branched-chain amino acid aminotransferase    | CGCAAGACTCTACTATCACT       | ATCATAAATGGACGAAGG          |
| <i>ackA</i> - acetate kinase                                | AAAGGTAGTGGCATTCCGG        | GTGCTTCTGCTGGGTTAT          |
| <i>ldh</i> - lactate dehydrogenase                          | AGCCAGGTGAAACTCGTC         | ATCTTCCAAGTTGCGTGA          |
| <i>RecA</i> (reference gene)                                | TTTCAACAGTGCCAACCG         | CAATGTCCACGCCAGAG           |

Table S3. The concentration of amino acids in the medium before batch culture (mmol/L)

| AA    | Total amino acids |            | Free amino acids |            | Peptide-bound amino acids |            |
|-------|-------------------|------------|------------------|------------|---------------------------|------------|
|       | Casein-AA         | Casein-PEP | Casein-AA        | Casein-PEP | Casein-AA                 | Casein-PEP |
| Ala   | 7.93              | 6.49       | 4.24             | 4.81       | 3.69                      | 1.68       |
| Arg   | 8.35              | 12.99      | 3.71             | 2.59       | 4.63                      | 10.41      |
| Asp   | 13.69             | 10.87      | 6.09             | 1.62       | 7.61                      | 9.25       |
| Glu   | 19.46             | 16.84      | 17.69            | 2.43       | 1.77                      | 14.41      |
| Gln   | 9.25              | 8.60       | 8.40             | 4.51       | 1.15                      | 4.08       |
| Gly   | 7.67              | 6.43       | 3.56             | 1.76       | 4.11                      | 4.68       |
| His   | 9.55              | 10.42      | 8.37             | 2.17       | 1.18                      | 8.16       |
| Ile   | 10.52             | 9.10       | 3.29             | 2.48       | 7.23                      | 6.62       |
| Leu   | 11.27             | 13.23      | 5.75             | 5.50       | 5.52                      | 7.73       |
| Lys   | 11.01             | 11.08      | 5.15             | 2.26       | 5.85                      | 8.83       |
| Met   | 3.28              | 3.61       | 1.72             | 1.29       | 1.56                      | 2.31       |
| Phe   | 4.25              | 4.74       | 2.56             | 1.97       | 1.70                      | 2.77       |
| Pro   | 8.44              | 10.33      | 7.63             | 3.57       | 0.80                      | 6.76       |
| Ser   | 5.74              | 3.20       | 3.60             | 1.48       | 2.14                      | 1.73       |
| Thr   | 7.45              | 9.74       | 1.25             | 0.31       | 6.21                      | 9.43       |
| Tyr   | 7.50              | 8.10       | 5.70             | 1.73       | 1.80                      | 6.36       |
| Val   | 8.63              | 7.57       | 4.35             | 2.15       | 4.29                      | 5.42       |
| Total | 153.99            | 153.34     | 93.06            | 42.62      | 60.93                     | 110.72     |

The substrate in Casein-AA group was provided with casein acid hydrolysate, which was rich in free amino acid source. The substrate in Casien-PEP group was provided with casein enzymatic hydrolysate, which was rich in peptide source.

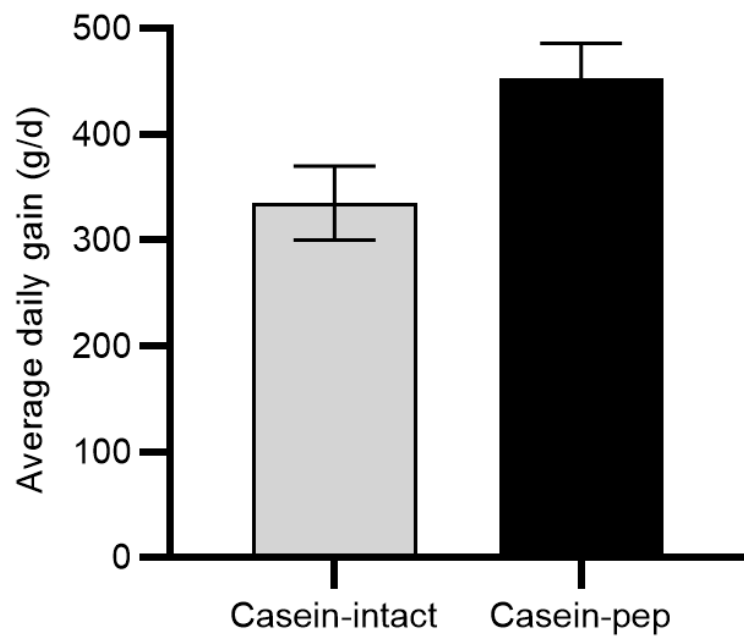

**Figure S1** The average daily growth of pigs (n = 8).

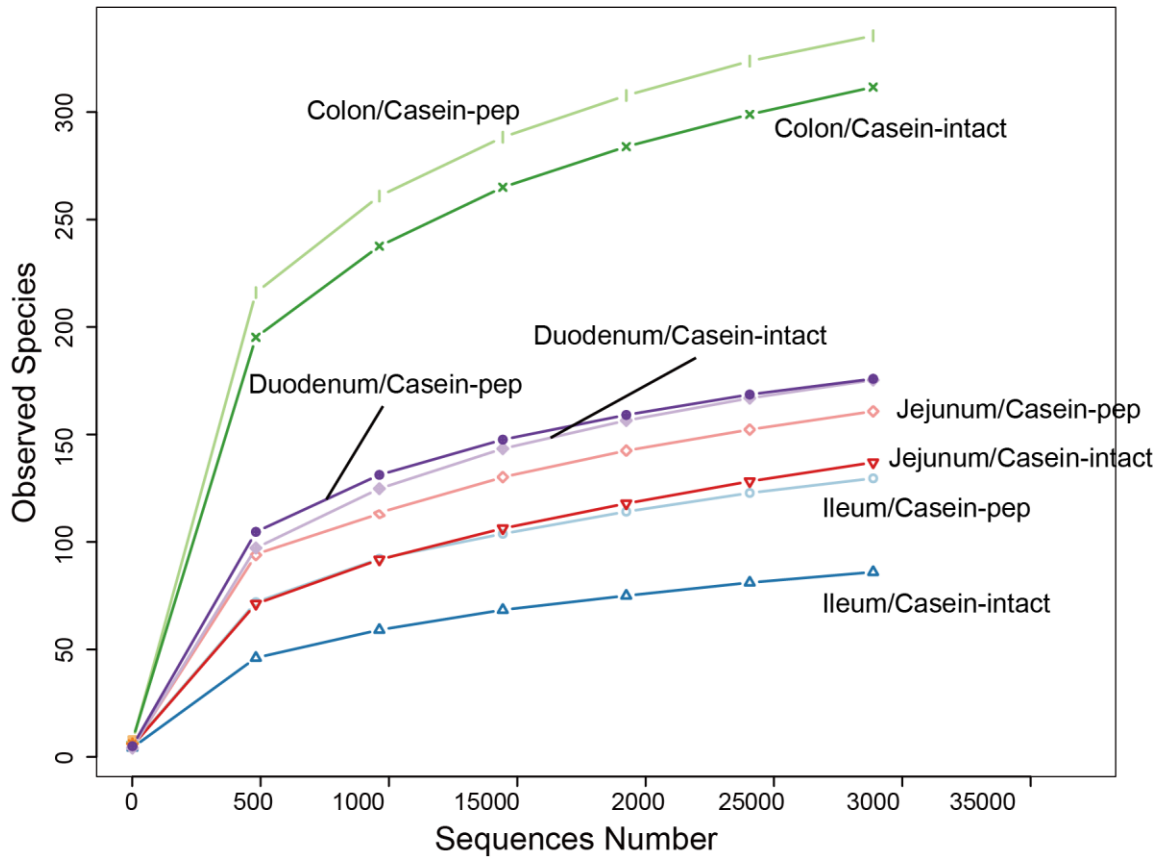

**Fig. S2** Rarefaction curves for OTUs of average reads within the same group (n = 8) were calculated for reads exhibiting  $\geq 97\%$  sequence identity. IC, intact casein; HC, hydrolyzed casein.

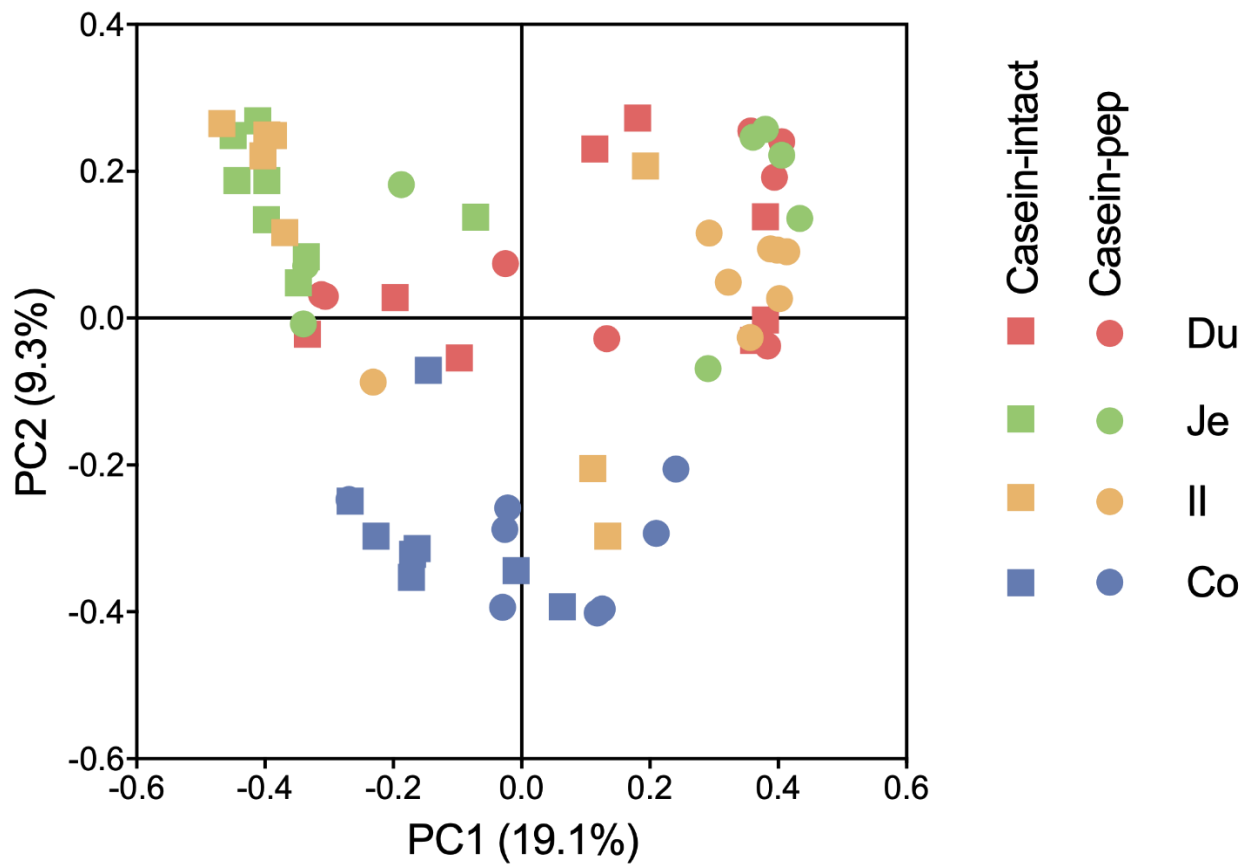

**Fig. S3** Principle coordinate analysis (PCoA, based on the weighted Unifrac distance) of all intestinal samples in intact casein (Casein-intact) and hydrolyzed casein (Casein-pep) group (n = 8). Co, colon; Du, duodenum; Il, ileum; Je, jejunum.

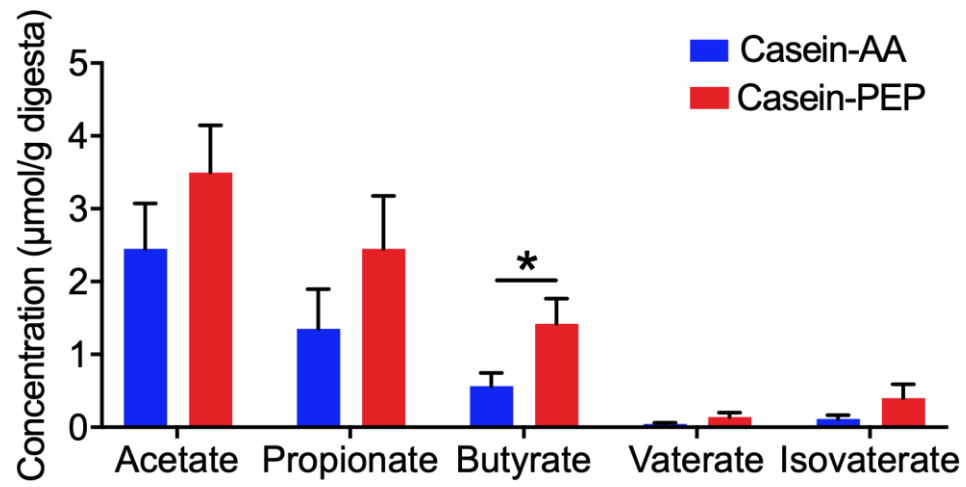

Fig. S4 Concentration of short-chain fatty acids in the jejunum. \* $p < 0.05$ .
